# Supplementary material for: Kinematics and time-resolved evolution of the main thrust-sense shear zone in the Eo-Alpine orogenic wedge (the Vinschgau Shear Zone, eastern Alps)
Source: Copernicus journal article supplement (doi:10.5194/se-14-551-2023), 2023-05-24
Supplement: Supplementary file 1 [file Montemagni et al_SUPPLEMENTARY_Table_1.xlsx]

## Sheet: Table
Supplementary Table 1: Sample list with coordinates in UTM32N and elevation m a.s.l.
Sample	Locality	X	Y	elevation a.s.l.
JVL-1	Juval	650444	5168401	881.088
JVL-2	Juval	650718	5168427	824.823
JVL-3	Juval	650928	5168253	780.649
JVL-4	Juval	650990	5168184	766.432
JVL-5	Juval	651096	5168175	709.753
JVL-6	Juval	651083	5168142	705.543
JVL-7	Juval	650918	5168044	690.112
JVL-8	Juval	650892	5168026	692.454
JVL-9	Juval	650876	5168014	683.579
JVL-10	Juval	650862	5168008	679.425
JVL-11	Juval	650844	5168003	677.297
JVL-12	Juval	650809	5168003	673.167
JVL-13	Juval	650825	5168003	677.319
JVL-14	Juval	651004	5167891	593.04
JVL-15	Juval	651226	5168059	569.099
JVL-16	Juval	651006	5168609	654.22
JVL-17	Juval	651071	5168520	642.467
JVL-18	Juval	651358	5168216	604.521
SCH-1	Schlanders	636186	5165686	802.89
SCH-2	Schlanders	636337	5165666	810.11
SCH-3	Schlanders	636322	5165667	811.08
SCH-4	Schlanders	636308	5165667	816.73
SCH-5	Schlanders	636396	5165812	921.16
ERY-1	Eyrs	626280	5166729	1405.59
ERY-2	Eyrs	626337	5166822	1421.13
ERY-3	Eyrs	626348	5166824	1420.83
ERY-4	Eyrs	626440	5166778	1375.62
ERY-5	Eyrs	626383	5166885	1425.28
ERY-6	Eyrs	626526	5166667	1269.79
ERY-7	Eyrs	626509	5166627	1247.43
ERY-8	Eyrs	626376	5166352	1190.29
ERY-9	Eyrs	626315	5166088	1072.87
ERY-10	Eyrs	626375	5165975	1064.51
ERY-11	Eyrs	626342	5165934	1025.36
