# Supplementary material for: Kinematics and time-resolved evolution of the main thrust-sense shear zone in the Eo-Alpine orogenic wedge (the Vinschgau Shear Zone, eastern Alps)
Source: Copernicus journal article supplement (doi:10.5194/se-14-551-2023), 2023-05-24
Supplement: Supplementary file 2 [file Montemagni et al_SUPPLEMENTARY_Table_2_R1.xlsx]

## Sheet: Foglio1
Supplementary Table 2: Electron probe micro analyses of micas (wt% oxides). Atomic proportions (apfu) were recalculated based on 11 oxygens.
	SCH-4	SCH-4	SCH-4	SCH-4	SCH-4	SCH-4	SCH-4	SCH-4	SCH-4	SCH-4		ERY-11	ERY-11	ERY-11	ERY-11	ERY-11	ERY-11	ERY-11	ERY-11	ERY-11	ERY-11	ERY-11	ERY-11	ERY-11	ERY-11		JVL-15	JVL-15	JVL-15	JVL-15	JVL-15	JVL-15	JVL-15	JVL-15	JVL-15	JVL-15	JVL-15	JVL-15	JVL-15	JVL-15	JVL-15	JVL-15	JVL-15		JVL-7	JVL-7	JVL-7	JVL-7	JVL-7
	Wm2	Wm2	Wm2	Wm2	Wm2	Wm2	Wm2	Wm1	Wm1	Wm1		Wm2	Wm2	Wm2	Wm2	Wm1	Wm1	Wm1	Wm1	Wm1	Bt2	Bt2	Bt2	Bt1	Bt1		Wm2	Wm2	Wm1	Bt2	Bt2	Bt2	Bt2	Bt2	Bt2	Bt1	Bt1	Bt1	Bt1	Bt1	Bt1	Bt1	Bt1		Wm2	Wm2	Wm2	Wm2	Wm2
spot num	1	3	4	7	8	11	12	2	5	6		23	24	25	26	15	16	17	18	20	13	14	19	21	22		35	36	43	30	31	32	34	37	42	27	28	29	33	38	39	40	41		45	47	48	51	52
wt%
SiO2	48.71	49.44	47.01	49.55	48.12	47.44	46.42	47.05	48.09	49.58		48.25	47.58	48.26	47.2	48.05	48.11	47.94	47.73	47.47	26.18	25.73	25.64	26.04	26.75		46.84	47.61	46.96	36.57	35.88	36.69	35.68	36.21	34.64	35.96	36.58	35.69	35.72	36.03	36.27	35.76	36.1		49.96	49.69	48.69	48.6	47.77
TiO2	0.186	0.2501	0.2606	0.2575	0.1615	0.4434	0.2484	0.2182	0.221	0.2027		0.2477	0.3332	0.1239	0.1805	0.2816	0.1226	0.196	0.2403	0.3075	0.01	0.0791	0.0936	0.0934	0.069		0.5846	0.7069	0.5216	1.94	2.02	2.08	1.71	1.68	1.89	1.321	2.29	1.5887	2.18	1.77	2.14	1.4973	1.68		0.3853	0.6319	0.6514	0.891	0.5222
Al2O3	27.54	28.12	26.28	27.89	27.56	28.38	26.24	26.34	26.54	27.69		33.84	33.67	33.54	34.79	33.5	33.48	33.01	33.12	34.65	22.86	22.42	22.52	22.15	22.46		31.18	31.27	30.59	17.17	16.65	16.9	16.83	16.68	15.33	16.53	17.02	16.88	16.75	16.73	17.05	17.13	16.86		27.49	27.58	27.52	29.13	29.26
FeO	4.13	3.97	4.2	3.95	4	3.81	3.84	4.06	4.19	4.08		1.1741	1.2446	1.0699	0.9084	1.2828	1.0678	1.2141	1.187	1.0446	24.02	23.43	22.77	23.58	23.39		3.28	3.06	3.01	23.18	23.56	23.01	23.47	23.96	23.27	23.84	22.99	23.37	23.33	23.09	23.03	23.34	23.7		2.95	3.49	3.76	3.31	3
MnO	0.0158	0.042	0.1072	0.0293	0.0075	0.021	0	0.042	0.042	0.0863		0	0.0631	0.0481	0.0105	0.0248	0.0136	0	0.0376	0.0263	0.0789	0.0965	0.0687	0.0971	0.0716		0.0217	0.0142	0.0465	0.2426	0.2854	0.2046	0.2074	0.3168	0.3293	0.3416	0.2858	0.3286	0.2636	0.2477	0.2529	0.3068	0.361		0	0.0022	0.0466	0.0217	0
MgO	2.19	2.03	1.95	2	2.05	2.03	2.58	2	2.07	2.04		1.319	1.1992	1.3902	1.0557	1.4162	1.3981	1.6307	1.4588	1.0538	15.63	15.79	16.21	16.6	15.91		1.6245	1.4806	1.6415	7.7	7.68	7.63	8	7.99	7.74	8.03	7.37	7.98	7.75	7.88	7.69	7.79	7.83		2.85	2.66	2.67	2.22	2.02
CaO	0.0358	0	0.1336	0	0.0038	0.1629	0.1246	0.1813	0.1631	0.0946		0.0036	0.0485	0.0043	0.0212	0.0073	0.001	0.0083	0.0015	0.0334	0.0408	0.069	0	0.0144	0.0383		0.0062	0.0522	0.0004	0.0409	0.0396	0.0968	0.0315	0	0.2981	0.0899	0.0331	0.0052	0.0172	0	0.0192	0	0.1173		0.0333	0.012	0.0242	0.0315	0.1227
BaO	0	0	0	0	0	0	0	0	0	0		0	0	0	0	0	0	0	0	0	0	0	0	0	0		0	0	0	0	0	0	0	0	0	0	0	0	0	0	0	0	0		0	0	0	0	0
Na2O	0.0893	0.1051	0.07	0.1103	0.1475	0.1722	0.1434	0.1522	0.1092	0.1199		0.8578	0.8249	0.653	0.7663	1.0258	0.85	0.763	0.7385	1.0218	0.177	0.2982	0	0.0104	0.0783		0.3108	0.2927	0.2633	0.118	0.0339	0.043	0.023	0.047	0.1054	0.1087	0.0485	0.0196	0.0742	0.0405	0.0367	0	0.0666		0.2452	0.2198	0.2406	0.0447	0.2649
K2O	11.54	11.6	11.36	11.51	11.54	10.89	10.73	11.37	11.3	11.2		10.31	10.27	10.61	10.43	10.26	10.6	10.51	10.71	10.14	0.0864	0.0996	0.0613	0	0.0541		11.59	11.37	11.49	10.13	10.16	9.94	10.1	9.9	9.33	9.87	10.07	10.08	9.94	10.11	10.2	10.05	9.79		11.43	11.53	11.42	11.33	11.39
F	0	0	0	0	0	0	0	0	0	0		0	0	0	0	0	0	0	0	0	0	0	0	0	0		0	0	0	0	0	0	0	0	0	0	0	0	0	0	0	0	0		0	0	0	0	0
Cl	0.0047	0	0	0.0013	0.0054	0	0.0013	0.0108	0.0345	0.0048		0.0211	0.0109	0	0.0122	0.0102	0.017	0.0054	0	0.015	0.0242	0.1103	0.0209	0.0074	0.0646		0.0061	0	0.0277	0.0395	0.05	0.0896	0.0349	0.0415	0.077	0.0856	0.0277	0.029	0.0323	0.0645	0.0257	0.0343	0.0764		0.0366	0.0034	0.023	0.0101	0.019
tot	94.4416	95.5573	91.3714	95.2984	93.5957	93.3495	90.3278	91.4245	92.7599	95.0984		96.0234	95.2445	95.6995	95.3749	95.8588	95.6601	95.2776	95.2238	95.7625	89.1074	88.1228	87.3846	88.5928	88.8859		95.444	95.8567	94.551	97.1311	96.3589	96.6841	96.0869	96.8254	93.0099	96.1768	96.7152	95.9712	96.0574	95.9627	96.7146	95.9085	96.5814		95.3804	95.8193	95.0459	95.8092	94.2203
apfu
Si	3.3363	3.3395	3.33968	3.35313	3.32664	3.27714	3.32057	3.33924	3.35834	3.36032		3.17741	3.16318	3.19001	3.12911	3.17467	3.18508	3.18778	3.17967	3.13414	2.1099	2.10027	2.09669	2.10706	2.15185		3.16955	3.19464	3.20153	2.79227	2.77673	2.81083	2.76626	2.78587	2.78523	2.79055	2.80153	2.76945	2.76667	2.79112	2.78266	2.77352	2.78277		3.36439	3.34202	3.31227	3.26688	3.26245
Ti	0.00958043	0.012704	0.0139224	0.0131041	0.00839609	0.0230341	0.0133624	0.0116457	0.0116061	0.0103312		0.0122666	0.0166582	0.00615886	0.00899872	0.0139914	0.0061038	0.009801	0.0120384	0.0152675	0.000606061	0.00485552	0.00575595	0.0056834	0.00417409		0.0297484	0.0356702	0.0267419	0.111393	0.117559	0.119832	0.0996984	0.0972001	0.11428	0.07709	0.13189	0.0927073	0.126978	0.103113	0.123467	0.0873308	0.0973876		0.0195123	0.0319604	0.0333241	0.0450401	0.0268195
Al	2.22316	2.23861	2.20039	2.22441	2.24553	2.31059	2.21224	2.20325	2.18439	2.21185		2.62643	2.63817	2.61293	2.71828	2.60862	2.61234	2.58699	2.6004	2.69626	2.17134	2.1569	2.17043	2.11237	2.1294		2.48666	2.47292	2.45793	1.54512	1.51864	1.52593	1.53784	1.51248	1.45273	1.51183	1.53628	1.54376	1.52905	1.52746	1.54169	1.56585	1.53175		2.18182	2.18622	2.20645	2.3078	2.35517
Fe	0.236569	0.224261	0.249531	0.223544	0.23126	0.220108	0.22972	0.240976	0.244705	0.231256		0.0646607	0.0691973	0.0591436	0.0503635	0.0708801	0.05912	0.0675156	0.0661304	0.0576779	1.61892	1.59943	1.55718	1.59566	1.57354		0.185615	0.171713	0.171615	1.48015	1.52481	1.47422	1.52174	1.54163	1.56473	1.54716	1.47248	1.51658	1.51119	1.49588	1.47763	1.51389	1.52784		0.166137	0.196302	0.213911	0.186074	0.171344
Mn	0.00091663	0.00240293	0.00645059	0.00167944	0.000439168	0.00122874	0	0.00252479	0.00248432	0.0049542		0	0.00355319	0.00269302	0.000589601	0.00138786	0.000762629	0	0.00212162	0.00147077	0.0053859	0.00667192	0.00475842	0.00665496	0.00487856		0.00124374	0.000807051	0.00268517	0.0156896	0.0187079	0.0132764	0.0136196	0.0206446	0.0224266	0.0224532	0.0185397	0.0215975	0.0172934	0.0162529	0.0164343	0.0201548	0.0235704		0	0.000125329	0.0026851	0.00123551	0
Mg	0.223578	0.204379	0.206484	0.201731	0.211237	0.209018	0.275083	0.21157	0.215465	0.206082		0.129466	0.118831	0.136968	0.104317	0.139466	0.137962	0.161622	0.144852	0.103704	1.87753	1.92111	1.97577	2.00208	1.90764		0.163846	0.14808	0.166804	0.876313	0.885889	0.871261	0.924473	0.916255	0.9276	0.928802	0.841308	0.922969	0.894714	0.909866	0.879379	0.900552	0.89964		0.286066	0.26666	0.270728	0.222427	0.205626
Ca	0.00262719	0	0.0101691	0	0.000281465	0.0120568	0.00954964	0.0137863	0.0122035	0.00686951		0.000254003	0.00345464	0.000304533	0.00150583	0.000516761	7.09327e-05	0.000591329	0.000107064	0.00236269	0.00352301	0.00603455	0	0.00124842	0.00330103		0.000449504	0.0037528	2.9218e-05	0.00334593	0.00328351	0.00794554	0.00261661	0	0.0256807	0.00747466	0.00271607	0.000432327	0.00142737	0	0.00157825	0	0.00968789		0.00240265	0.000864734	0.00176385	0.00226866	0.00897831
Ba	0	0	0	0	0	0	0	0	0	0		0	0	0	0	0	0	0	0	0	0	0	0	0	0		0	0	0	0	0	0	0	0	0	0	0	0	0	0	0	0	0		0	0	0	0	0
Na	0.011859	0.0137643	0.00964191	0.0144721	0.0197707	0.023064	0.0198887	0.0209436	0.0147857	0.0157559		0.109525	0.106329	0.0836889	0.0984982	0.131407	0.109107	0.0983704	0.0953875	0.130802	0.0276577	0.0471946	0	0.00163162	0.0122124		0.0407767	0.0380799	0.0348041	0.0174688	0.00508664	0.00638713	0.00345737	0.00701101	0.0164314	0.016355	0.00720183	0.00294886	0.0111429	0.00608302	0.0054592	0	0.00995392		0.0320151	0.0286628	0.0317345	0.0345247	0.0153999
K	1.00828	0.999514	1.02949	0.993597	1.01769	0.959636	0.979119	1.02938	1.00664	0.968322		0.866088	0.87096	0.894639	0.882047	0.864731	0.895198	0.891498	0.91014	0.854015	0.00888247	0.010371	0.00639448	0	0.00555155		1.00044	0.973221	0.999258	0.986664	1.003	0.971407	0.998888	0.971619	0.956958	0.977048	0.983804	0.997783	0.982111	0.999065	0.998254	0.994325	0.962677		0.98188	0.989231	0.991015	0.971528	0.992295
F	0	0	0	0	0	0	0	0	0	0		0	0	0	0	0	0	0	0	0	0	0	0	0	0		0	0	0	0	0	0	0	0	0	0	0	0	0	0	0	0	0		0	0	0	0	0
Cl	0.000545578	0	0	0.000149095	0.000632682	0	0.000157602	0.00129904	0.0040832	0.000551349		0.00235488	0.00122811	0	0.00137073	0.00114213	0.00190742	0.000608548	0	0.00167843	0.00330536	0.0152588	0.00289651	0.0010148	0.0088071		0.000699555	0	0.00320052	0.00511141	0.00655787	0.0116334	0.00458569	0.00541119	0.0104927	0.0112579	0.00359536	0.00381379	0.00423994	0.00846809	0.00334162	0.00450858	0.00998102		0.00417712	0.000387553	0.00265171	0.00115062	0.00219915
tot	7.05342	7.03513	7.06576	7.02582	7.06188	7.03588	7.05969	7.07461	7.0547	7.01629		6.98845	6.99156	6.98653	6.99508	7.00681	7.00766	7.00477	7.01085	6.99738	7.82705	7.8681	7.81988	7.83341	7.80136		7.07903	7.03888	7.0646	7.83352	7.86027	7.81272	7.87318	7.85812	7.87656	7.89003	7.79934	7.87205	7.84482	7.85731	7.8299	7.86014	7.85526		7.0384	7.04244	7.06653	7.03893	7.04029
[truncated: 41 more columns]
