# Supplementary material for: Kinematics and time-resolved evolution of the main thrust-sense shear zone in the Eo-Alpine orogenic wedge (the Vinschgau Shear Zone, eastern Alps)
Source: Copernicus journal article supplement (doi:10.5194/se-14-551-2023), 2023-05-24
Supplement: Supplementary file 3 [file Montemagni et al_SUPPLEMENTARY_Table_3_R1.xlsx]

## Sheet: JVL
Supplementary Table 3: 40Ar/39Ar data. All Ar isotope concentrations are given as mL. K, Ca and Cl concentrations are calculated from the sample mass and the 39Ar, 37Ar and 38Ar concentrations, respectively.
SAMPLE	Step #	T (K)	DT	Dt	39Ar%	release	40Ar Total	Err.40Ar	40Ar*	Err.40Ar*	39Ar	Err.39Ar	%39Ar	38Ar	Err.38Ar	38ArCl	Err.38Cl	37Ar	Err.37Ar	36Ar	Err.36Ar	Age	1 s Err Age	Ca/K	Error Ca/K	Cl/K	Error Cl/K
JVL-1 Bt	1	931.629	200	16	22.3074	0.0278842	5.57942e-08	1.488e-11	1.23616e-08	9.82332e-11	1.73675e-10	5.633e-13	22.3074	3.845e-11	5.55367e-14	9.19088e-12	7.62177e-14	7.29954e-12	9.37918e-14	1.45475e-10	3.25227e-13	52.2396	0.448498	0.0815403	0.00108058	0.00941976	8.38782e-05
J= 0.00041276	2	961.197	29.5681	18	10.3932	0.0828492	1.74503e-08	4.96e-12	9.73119e-09	1.8495e-11	8.09164e-11	4.6563e-13	10.3932	9.5994e-12	1.9617e-14	3.87205e-12	6.45749e-14	2.91337e-12	9.05214e-14	2.58551e-11	5.96781e-14	87.4037	0.529984	0.0698508	0.00220725	0.00851773	0.000150271
m= 0.00364 g	3	1001.33	40.132	17	9.40032	0.0568104	1.16225e-08	3.10001e-12	9.10825e-09	7.79171e-12	7.31865e-11	5.26974e-13	9.40032	5.66705e-12	1.32943e-14	3.3083e-12	7.31258e-14	2.03034e-12	9.02241e-14	8.4218e-12	2.39432e-14	90.3736	0.655566	0.0538206	0.00242286	0.00804626	0.000187051
	4	1042.26	40.9328	16	7.57347	0.0462555	9.54598e-09	2.94501e-12	7.65908e-09	6.25396e-12	5.89635e-11	5.88277e-13	7.57347	4.34289e-12	1.17064e-14	2.53012e-12	8.39197e-14	1.76978e-12	9.02119e-14	6.32047e-12	1.84792e-14	94.2245	0.943424	0.0582299	0.00302451	0.00763797	0.000264551
	5	1077.03	34.7728	17	6.42176	0.044791	8.30628e-09	2.41801e-12	6.58202e-09	5.61861e-12	4.99969e-11	5.26302e-13	6.42176	3.47216e-12	1.03261e-14	1.85651e-12	9.24565e-14	1.6974e-12	9.02088e-14	5.77568e-12	1.69871e-14	95.4637	1.00842	0.0658648	0.00356841	0.00660958	0.000336439
	6	1137.05	60.015	18	9.59889	0.0376986	1.20255e-08	3.72001e-12	9.74357e-09	7.43812e-12	7.47325e-11	5.8872e-13	9.59889	5.02504e-12	1.26791e-14	2.79675e-12	7.863e-14	2.04482e-12	9.01562e-14	7.64353e-12	2.15737e-14	94.5664	0.748708	0.053083	0.0023775	0.00666138	0.000194496
	7	1198.6	61.5471	18	10.274	0.0393456	1.29863e-08	4.34e-12	1.04604e-08	7.94242e-12	7.99888e-11	5.88891e-13	10.274	5.54667e-12	1.39543e-14	3.10891e-12	7.84092e-14	2.34881e-12	9.07508e-14	8.46072e-12	2.22796e-14	94.8453	0.702241	0.0569678	0.00224066	0.0069183	0.000181767
	8	1305.22	106.621	17	8.60604	0.0195765	1.19947e-08	3.10001e-12	8.73697e-09	9.14285e-12	6.70026e-11	4.95922e-13	8.60604	5.26579e-12	1.24241e-14	2.50237e-12	7.35745e-14	2.89889e-12	9.0277e-14	1.09123e-11	2.88091e-14	94.5803	0.707274	0.0839373	0.00268678	0.00664783	0.000201557
	9	1395.73	90.5161	17	8.32804	0.0223148	1.19328e-08	3.41001e-12	8.61695e-09	8.89336e-12	6.48382e-11	4.9585e-13	8.32804	5.22567e-12	1.41929e-14	2.44835e-12	8.45572e-14	2.84099e-12	9.13803e-14	1.11068e-11	2.75108e-14	96.3472	0.743766	0.0850067	0.00281046	0.00672145	0.000237758
	10	1608.29	212.556	18	7.0969	0.00786972	1.50021e-08	4.65e-12	7.49225e-09	1.78458e-11	5.52532e-11	5.26432e-13	7.0969	7.27209e-12	1.50592e-14	1.94669e-12	6.54047e-14	4.08591e-12	9.217e-14	2.51546e-11	5.77082e-14	98.2537	0.965182	0.143468	0.0035132	0.00627134	0.000219013
Conc (g/g)	K	Cl	Ca
	0.0740993	0.00056858	0.00552641
SAMPLE	Step #	T (K)	DT	Dt	39Ar%	release	40Ar Total	Err.40Ar	40Ar*	Err.40Ar*	39Ar	Err.39Ar	%39Ar	38Ar	Err.38Ar	38ArCl	Err.38Cl	37Ar	Err.37Ar	36Ar	Err.36Ar	Age	1 s Err Age	Ca/K	Error Ca/K	Cl/K	Error Cl/K
JVL-1 Wm	1	931.228	200	16	2.86128	0.00357659	2.47987e-08	7.44e-12	5.13146e-09	4.89574e-11	3.61237e-11	5.57596e-13	2.86128	1.37405e-11	2.7278e-14	9.3702e-13	6.9024e-14	1.02661e-11	9.42176e-14	6.58764e-11	1.62074e-13	103.864	1.88511	0.551442	0.00990417	0.00461718	0.000347506
J= 0.0004171	2	961.603	30.3749	13	2.14044	0.0195441	8.98904e-09	2.88301e-12	3.40282e-09	1.41641e-11	2.70231e-11	5.57446e-13	2.14044	4.22787e-12	1.27904e-14	4.14758e-13	9.44194e-14	2.98306e-12	9.01897e-14	1.87113e-11	4.64482e-14	92.3563	1.94379	0.214171	0.00783903	0.00273199	0.000624484
m= 0.00644 g	3	1002.15	40.55	18	2.51802	0.0146363	4.98988e-09	1.51901e-12	3.5725e-09	5.36515e-12	3.17901e-11	5.57519e-13	2.51802	1.39797e-12	6.89006e-15	1.67643e-13	1.52962e-13	2.17697e-12	8.92933e-14	4.74796e-12	1.72348e-14	82.6437	1.45483	0.132856	0.00592665	0.00093867	0.000856629
	4	1041.84	39.6911	18	6.61256	0.0392682	1.17152e-08	3.72001e-12	9.86931e-09	6.90654e-12	8.34838e-11	5.28229e-13	6.61256	2.34923e-12	9.62567e-15	3.04187e-13	1.27223e-13	2.07798e-12	8.92871e-14	6.18309e-12	1.94905e-14	86.8347	0.553064	0.0482889	0.00209727	0.000648573	0.00027129
	5	1079.99	38.1496	18	16.7386	0.103417	2.7149e-08	8.68e-12	2.52105e-08	1.0659e-11	2.11325e-10	5.99154e-13	16.7386	3.98906e-12	1.05775e-14	5.39787e-13	8.25949e-14	2.19111e-12	8.92942e-14	6.49338e-12	2.07206e-14	87.6073	0.251745	0.0201149	0.000821722	0.000454665	6.95819e-05
	6	1136.62	56.6266	18	18.5284	0.0771226	2.97212e-08	7.44e-12	2.79101e-08	9.51039e-12	2.33922e-10	6.62245e-13	18.5284	4.10847e-12	1.20289e-14	5.01737e-13	9.11732e-14	2.3891e-12	8.95646e-14	6.06673e-12	1.98419e-14	87.6193	0.250461	0.0198138	0.000744912	0.00038179	6.93855e-05
	7	1199.03	62.4125	18	18.1852	0.0686767	2.93493e-08	7.44e-12	2.74804e-08	9.42044e-12	2.29588e-10	6.31426e-13	18.1852	4.06866e-12	1.13066e-14	4.70876e-13	8.65441e-14	2.89821e-12	8.98825e-14	6.26066e-12	1.93545e-14	87.8921	0.244232	0.0244898	0.000762486	0.000365071	6.71052e-05
	8	1302.99	103.961	17	15.6353	0.0364763	2.60644e-08	9.3e-12	2.36628e-08	1.15812e-11	1.97396e-10	5.67341e-13	15.6353	4.06866e-12	1.20131e-14	4.73192e-13	9.18769e-14	3.54874e-12	8.96653e-14	8.04487e-12	2.3117e-14	88.022	0.257235	0.0348773	0.000886922	0.000426697	8.28583e-05
	9	1396.19	93.1917	18	9.16246	0.0231739	1.65191e-08	4.65e-12	1.39091e-08	8.8431e-12	1.15676e-10	5.91507e-13	9.16246	3.19701e-12	1.09757e-14	3.30128e-13	1.06759e-13	3.42146e-12	9.05513e-14	8.74303e-12	2.51937e-14	88.2851	0.45527	0.0573822	0.00154675	0.000507993	0.000164299
	10	1607.83	211.647	17	7.61781	0.00872958	3.00358e-08	8.37e-12	1.24526e-08	4.21463e-11	9.61751e-11	7.13898e-13	7.61781	1.25464e-11	2.23503e-14	4.28208e-13	6.16499e-14	5.78316e-12	9.23497e-14	5.88947e-11	1.38353e-13	94.8938	0.774411	0.11666	0.00205436	0.000792523	0.000114253
Conc (g/g)	K	Cl	Ca
	0.06721	4.32825e-05	0.00389733
SAMPLE	Step #	T (K)	DT	Dt	39Ar%	release	40Ar Total	Err.40Ar	40Ar*	Err.40Ar*	39Ar	Err.39Ar	%39Ar	38Ar	Err.38Ar	38ArCl	Err.38Cl	37Ar	Err.37Ar	36Ar	Err.36Ar	Age	1 s Err Age	Ca/K	Error Ca/K	Cl/K	Error Cl/K
JVL-7 Bt	1	930.827	200	16	16.6322	0.0207902	5.24036e-08	1.519e-11	1.81952e-08	7.79315e-11	1.85982e-10	5.34378e-13	16.6322	2.92121e-11	4.5499e-14	5.64941e-12	6.85643e-14	4.73942e-12	1.02568e-13	1.14579e-10	2.56018e-13	71.729	0.370227	0.0494383	0.00107931	0.00540695	6.74356e-05
J= 0.00041458	2	961.197	30.3699	15	17.4864	0.148666	2.5043e-08	8.06e-12	2.14829e-08	1.22932e-11	1.95534e-10	5.35217e-13	17.4864	9.2891e-12	1.92855e-14	4.98197e-12	6.4933e-14	2.15568e-12	1.00618e-13	1.19248e-11	3.10897e-14	80.3581	0.225287	0.0213878	0.00100001	0.00453522	6.03997e-05
m= 0.00496 g	3	1001.74	40.544	16	10.471	0.0645659	1.45574e-08	4.03e-12	1.30268e-08	6.35345e-12	1.17088e-10	5.91121e-13	10.471	5.12118e-12	1.24776e-14	2.92165e-12	7.59136e-14	1.60328e-12	1.00319e-13	5.12694e-12	1.64515e-14	81.3516	0.412943	0.0265646	0.00166758	0.00444157	0.000117564
	4	1041.43	39.6852	17	6.88909	0.0421026	9.77051e-09	2.75901e-12	8.52095e-09	5.35364e-12	7.70342e-11	5.2774e-13	6.88909	3.41695e-12	1.07757e-14	1.81652e-12	9.80019e-14	1.5157e-12	1.00264e-13	4.18569e-12	1.53669e-14	80.891	0.55673	0.0381713	0.00253855	0.00419737	0.000228268
	5	1078.73	37.2996	16	4.92517	0.0330109	7.39983e-09	2.13901e-12	6.1634e-09	4.82052e-12	5.50735e-11	5.27063e-13	4.92517	2.58458e-12	9.42965e-15	1.22363e-12	1.13304e-13	1.46826e-12	9.97975e-14	4.14168e-12	1.44693e-14	81.8207	0.785834	0.0517215	0.00355017	0.00395482	0.000368154
	6	1136.62	57.8945	17	5.09136	0.0213291	8.18463e-09	2.51101e-12	6.32771e-09	6.10639e-12	5.69319e-11	4.96207e-13	5.09136	2.87357e-12	9.51161e-15	1.10119e-12	1.02837e-13	1.51076e-12	1.00089e-13	6.21996e-12	1.86436e-14	81.2725	0.712881	0.0514813	0.00344008	0.0034429	0.000322922
	7	1199.9	63.2843	16	7.01295	0.0277041	1.13096e-08	2.94501e-12	8.85894e-09	7.379e-12	7.84193e-11	5.58663e-13	7.01295	4.04166e-12	1.13486e-14	1.66801e-12	8.73972e-14	1.83168e-12	1.00328e-13	8.20888e-12	2.26616e-14	82.5757	0.59252	0.0453144	0.00250294	0.00378614	0.000200204
	8	1301.21	101.308	20	10.393	0.0229393	1.55286e-08	4.65e-12	1.3024e-08	8.33541e-12	1.16215e-10	5.29502e-13	10.393	5.4357e-12	1.22561e-14	2.63012e-12	7.03097e-14	1.80891e-12	1.00603e-13	8.38969e-12	2.31707e-14	81.9313	0.377323	0.0301968	0.00168503	0.00402842	0.000109242
	9	1394.83	93.6193	17	11.3879	0.029502	1.666e-08	4.65e-12	1.43142e-08	7.68101e-12	1.2734e-10	4.99413e-13	11.3879	5.81251e-12	1.52842e-14	2.99019e-12	8.18181e-14	1.76409e-12	1.00147e-13	7.85749e-12	2.04767e-14	82.1753	0.325703	0.0268758	0.00152938	0.00417979	0.000115537
	10	1607.37	212.542	16	9.71099	0.0114224	1.57374e-08	4.65e-12	1.23561e-08	9.47602e-12	1.08589e-10	4.98322e-13	9.71099	5.89876e-12	1.49513e-14	2.61967e-12	7.89651e-14	2.51772e-12	1.00637e-13	1.1326e-11	2.76549e-14	83.1607	0.387286	0.0449811	0.00180977	0.00429418	0.000130932
Conc (g/g)	K	Cl	Ca
	0.0777611	0.000341674	0.00282173
SAMPLE	Step #	T (K)	DT	Dt	39Ar%	release	40Ar Total	Err.40Ar	40Ar*	Err.40Ar*	39Ar	Err.39Ar	%39Ar	38Ar	Err.38Ar	38ArCl	Err.38Cl	37Ar	Err.37Ar	36Ar	Err.36Ar	Age	1 s Err Age	Ca/K	Error Ca/K	Cl/K	Error Cl/K
JVL-7 Wm	1	928.822	200	16	2.85325	0.00356656	2.59013e-08	8.68e-12	3.43664e-09	5.16652e-11	3.99221e-11	4.95798e-13	2.85325	1.54746e-11	2.76195e-14	8.66216e-13	6.42649e-14	3.66034e-12	1.03716e-13	7.52443e-11	1.70588e-13	63.7673	1.24355	0.177884	0.00550329	0.00386218	0.000290524
J= 0.00041792	2	961.197	32.3751	17	2.24828	0.0168428	9.9211e-09	3.00701e-12	3.11075e-09	1.62494e-11	3.14575e-11	4.95648e-13	2.24828	4.671e-12	1.15839e-14	3.83981e-14	7.77565e-14	1.97538e-12	1.02615e-13	2.28112e-11	5.3486e-14	73.0607	1.2129	0.121828	0.00661332	0.000217273	0.000439993
m= 0.0056 g	3	1000.92	39.7199	16	2.21699	0.0139539	4.83246e-09	1.61201e-12	3.04088e-09	5.41826e-12	3.10197e-11	5.88462e-13	2.21699	1.48318e-12	6.63865e-15	2.48401e-14	1.38966e-13	1.43787e-12	1.0185e-13	6.00109e-12	1.73262e-14	72.4394	1.38038	0.0899285	0.0065945	0.000142539	0.00079743
	4	1042.26	41.3449	16	2.76103	0.0166951	5.58179e-09	1.64301e-12	3.9279e-09	5.55661e-12	3.86318e-11	5.26703e-13	2.76103	1.48062e-12	7.34624e-15	2.91124e-14	1.5397e-13	1.42311e-12	1.0185e-13	5.53993e-12	1.77792e-14	75.0768	1.02922	0.0714673	0.00520678	0.000134138	0.000709436
	5	1079.99	37.7318	17	5.63212	0.0362026	1.03017e-08	2.88301e-12	8.50867e-09	6.12491e-12	7.88034e-11	4.66093e-13	5.63212	2.09841e-12	8.20772e-15	1.36145e-13	1.21426e-13	1.42565e-12	1.01917e-13	6.00607e-12	1.81001e-14	79.6252	0.474702	0.0350974	0.00251761	0.000307522	0.00027428
	6	1135.76	55.7678	18	13.821	0.0584142	2.40186e-08	7.44e-12	2.1728e-08	9.80662e-12	1.9338e-10	5.65502e-13	13.821	3.95842e-12	1.13197e-14	4.75857e-13	8.89897e-14	1.52219e-12	1.02316e-13	7.67252e-12	2.13985e-14	82.7857	0.245517	0.0152707	0.00102742	0.000438011	8.19221e-05
	7	1197.72	61.963	16	19.2987	0.0778637	3.30851e-08	8.99e-12	3.06778e-08	1.11699e-11	2.70023e-10	6.33535e-13	19.2987	5.03814e-12	1.24443e-14	6.75104e-13	7.70463e-14	1.64212e-12	1.02065e-13	8.06326e-12	2.22038e-14	83.6876	0.199405	0.0117979	0.000733815	0.00044503	5.07998e-05
	8	1303.88	106.159	16	23.6112	0.0556033	4.13365e-08	1.116e-11	3.76192e-08	1.43301e-11	3.30363e-10	5.51275e-13	23.6112	6.70893e-12	1.67275e-14	8.83294e-13	7.7772e-14	1.97064e-12	1.02333e-13	1.24514e-11	3.01088e-14	83.8751	0.14454	0.0115723	0.000601246	0.00047592	4.19112e-05
	9	1395.28	91.3997	17	15.3977	0.040859	2.78207e-08	8.68e-12	2.45586e-08	1.21798e-11	2.15442e-10	5.37094e-13	15.3977	4.89347e-12	1.34785e-14	5.65122e-13	8.57893e-14	1.65459e-12	1.02215e-13	1.09264e-11	2.86184e-14	83.9612	0.214077	0.0148992	0.000921176	0.000466909	7.08893e-05
	10	1606.92	211.633	18	12.1598	0.0135427	2.58133e-08	7.13e-12	1.92662e-08	1.65507e-11	1.70137e-10	5.0254e-13	12.1598	6.33236e-12	1.54861e-14	4.06236e-13	7.66252e-14	1.88506e-12	1.02611e-13	2.19295e-11	5.00275e-14	83.4198	0.257154	0.0214947	0.00117176	0.000425011	8.01764e-05
Conc (g/g)	K	Cl	Ca
	0.0854918	4.45957e-05	0.00220444
SAMPLE	Step #	T (K)	DT	Dt	39Ar%	release	40Ar Total	Err.40Ar	40Ar*	Err.40Ar*	39Ar	Err.39Ar	%39Ar	38Ar	Err.38Ar	38ArCl	Err.38Cl	37Ar	Err.37Ar	36Ar	Err.36Ar	Age	1 s Err Age	Ca/K	Error Ca/K	Cl/K	Error Cl/K
JVL-13 Bt	1	931.629	200	16	20.0194	0.0250243	7.1699e-08	1.829e-11	3.43768e-08	7.50299e-11	3.16584e-10	4.82048e-13	20.0194	3.31917e-11	4.62188e-14	6.28764e-12	6.33036e-14	5.82796e-12	1.06489e-13	1.25009e-10	2.43725e-13	79.288	0.211599	0.0357137	0.000654824	0.00353524	3.59973e-05
J= 0.00041376	2	961.603	29.974	20	15.3257	0.11433	3.19272e-08	9.3e-12	2.81717e-08	1.26943e-11	2.42358e-10	5.6565e-13	15.3257	8.66332e-12	1.554e-14	3.73988e-12	5.62688e-14	2.27093e-12	1.04003e-13	1.25793e-11	2.894e-14	84.7466	0.20216	0.0181782	0.000833597	0.00274676	4.18211e-05
m= 0.00646 g	3	1002.15	40.55	16	12.4104	0.0765131	2.46911e-08	6.82e-12	2.28867e-08	8.80039e-12	1.96256e-10	5.01476e-13	12.4104	6.20604e-12	1.43439e-14	3.00018e-12	7.19781e-14	1.91206e-12	1.03369e-13	6.04399e-12	1.8629e-14	85.0146	0.220334	0.0189009	0.00102295	0.00272109	6.56517e-05
	4	1045.19	43.0323	17	8.77604	0.0494629	1.7671e-08	4.96e-12	1.61179e-08	6.78433e-12	1.38783e-10	5.5966e-13	8.77604	4.52055e-12	1.1647e-14	2.07838e-12	8.01941e-14	1.76399e-12	1.03117e-13	5.20242e-12	1.55036e-14	84.6738	0.343734	0.0246585	0.00144488	0.00266569	0.000103416
	5	1079.15	33.9632	18	5.82801	0.0404461	1.19498e-08	3.10001e-12	1.0604e-08	5.20989e-12	9.21632e-11	4.96338e-13	5.82801	3.14497e-12	9.82793e-15	1.32442e-12	9.70859e-14	1.71037e-12	1.03617e-13	4.50833e-12	1.40247e-14	83.9037	0.45405	0.036003	0.00218972	0.00255792	0.000188013
	6	1134.04	54.895	16	8.39223	0.0382195	1.72554e-08	4.65e-12	1.54045e-08	6.95094e-12	1.32713e-10	4.97904e-13	8.39223	4.5067e-12	1.16433e-14	1.9401e-12	8.03703e-14	2.66553e-12	1.04332e-13	6.20017e-12	1.73048e-14	84.6285	0.320243	0.0389652	0.00153213	0.00260214	0.000108237
	7	1199.47	65.4253	17	7.99508	0.0296383	1.72141e-08	5.27e-12	1.46684e-08	8.3423e-12	1.26433e-10	5.28383e-13	7.99508	4.80615e-12	1.28394e-14	1.86671e-12	8.31487e-14	3.37775e-12	1.04364e-13	8.52741e-12	2.16604e-14	84.5888	0.357176	0.0518295	0.00161598	0.00262807	0.000117576
	8	1304.33	104.86	16	9.80493	0.0233763	4.43741e-08	1.333e-11	1.87234e-08	4.97117e-11	1.55054e-10	4.99005e-13	9.80493	2.02891e-11	2.81543e-14	2.45695e-12	5.29122e-14	3.03946e-12	1.04348e-13	8.59154e-11	1.60407e-13	87.9595	0.367402	0.0380296	0.00131132	0.00282056	6.14172e-05
	9	1395.28	90.9548	16	5.48996	0.0150898	1.32846e-08	3.41001e-12	1.01345e-08	8.35043e-12	8.68173e-11	4.96173e-13	5.48996	4.17551e-12	1.0817e-14	1.27172e-12	8.06637e-14	2.16163e-12	1.03999e-13	1.05514e-11	2.55307e-14	85.099	0.491684	0.0483042	0.00234032	0.00260739	0.000166053
	10	1605.08	209.799	18	5.95819	0.00669384	1.8062e-08	5.58e-12	1.13089e-08	1.47831e-11	9.42218e-11	4.96404e-13	5.95819	6.67027e-12	1.59677e-14	1.41238e-12	7.49395e-14	4.77776e-12	1.05155e-13	2.26203e-11	4.5852e-14	87.4418	0.47499	0.098376	0.00222636	0.0026682	0.000142269
Conc (g/g)	K	Cl	Ca
	0.0846031	0.000241679	0.00306259
SAMPLE	Step #	T (K)	DT	Dt	39Ar%	release	40Ar Total	Err.40Ar	40Ar*	Err.40Ar*	39Ar	Err.39Ar	%39Ar	38Ar	Err.38Ar	38ArCl	Err.38Cl	37Ar	Err.37Ar	36Ar	Err.36Ar	Age	1 s Err Age	Ca/K	Error Ca/K	Cl/K	Error Cl/K
JVL-13 Wm	1	930.025	200	16	3.13511	0.00391889	3.29943e-08	1.054e-11	5.38619e-09	6.29378e-11	5.33874e-11	5.5755e-13	3.13511	1.94487e-11	3.44588e-14	1.45012e-12	6.77888e-14	4.8397e-12	1.04608e-13	9.2472e-11	2.07827e-13	74.1176	1.16168	0.175877	0.00422203	0.00483486	0.000231588
J= 0.00041567	2	961.197	31.1719	15	2.53198	0.0209726	1.67068e-08	4.34e-12	4.98748e-09	2.56135e-11	4.31167e-11	5.26424e-13	2.53198	8.20711e-12	1.80531e-14	3.514e-13	7.03024e-14	2.88128e-12	1.0254e-13	3.92534e-11	8.45495e-14	84.7268	1.12241	0.129647	0.0048779	0.00145069	0.000290771
m= 0.00658 g	3	1001.74	40.544	17	2.33607	0.0139745	6.14948e-09	1.95301e-12	4.35384e-09	5.81027e-12	3.97806e-11	5.5727e-13	2.33607	1.78048e-12	8.85598e-15	2.27217e-13	1.54369e-13	1.9652e-12	1.02186e-13	6.01486e-12	1.83286e-14	80.2643	1.12963	0.0958412	0.00516121	0.00101669	0.000690879
	4	1041.43	39.6852	18	2.56061	0.0152082	6.39947e-09	1.82901e-12	4.79603e-09	5.70168e-12	4.36043e-11	4.95531e-13	2.56061	1.64269e-12	7.01326e-15	1.70608e-13	1.32523e-13	1.78736e-12	1.01898e-13	5.37102e-12	1.8088e-14	80.6537	0.92174	0.0795239	0.00462289	0.000696453	0.000541038
	5	1078.73	37.2996	17	4.95253	0.0322032	1.12657e-08	3.41001e-12	9.47123e-09	6.58377e-12	8.43358e-11	5.2765e-13	4.95253	2.23793e-12	7.87291e-15	2.16453e-13	1.09291e-13	1.85122e-12	1.01874e-13	6.0108e-12	1.88634e-14	82.3113	0.518421	0.0425848	0.00235857	0.000456849	0.000230687
	6	1136.19	57.4651	17	15.565	0.0656932	3.34904e-08	9.3e-12	3.08168e-08	1.17735e-11	2.65054e-10	5.12211e-13	15.565	5.12352e-12	1.31778e-14	6.4438e-13	8.00898e-14	2.53495e-12	1.02851e-13	8.95546e-12	2.41818e-14	85.1473	0.168593	0.018554	0.000753653	0.000432741	5.37917e-05
	7	1198.16	61.9697	17	19.125	0.0748508	4.06897e-08	1.209e-11	3.80569e-08	1.40514e-11	3.25676e-10	5.50226e-13	19.125	5.80285e-12	1.3452e-14	7.11119e-13	7.22957e-14	3.28456e-12	1.02898e-13	8.81918e-12	2.3984e-14	85.5685	0.148966	0.0195657	0.000613843	0.000388666	3.9519e-05
	8	1305.66	107.502	16	25.5271	0.0593641	5.43038e-08	1.302e-11	5.09024e-08	1.576e-11	4.34697e-10	5.39957e-13	25.5271	7.72032e-12	1.78406e-14	9.95252e-13	7.21362e-14	4.84726e-12	1.03772e-13	1.13937e-11	2.97431e-14	85.7428	0.111096	0.0216329	0.000463906	0.000407536	2.95427e-05
	9	1395.28	89.6203	16	15.3146	0.0427207	3.39958e-08	8.68e-12	3.06788e-08	1.22259e-11	2.6079e-10	5.11673e-13	15.3146	5.48083e-12	1.40398e-14	6.3987e-13	7.98233e-14	3.73171e-12	1.03289e-13	1.11111e-11	2.88381e-14	86.1286	0.173296	0.0277602	0.000770294	0.000436738	5.44895e-05
	10	1608.75	213.465	17	8.95203	0.0101712	3.4497e-08	1.023e-11	1.82526e-08	3.80983e-11	1.52443e-10	5.31395e-13	8.95203	1.22568e-11	2.52357e-14	3.91937e-13	6.81913e-14	5.26021e-12	1.03436e-13	5.44103e-11	1.2292e-13	87.6279	0.356469	0.0669435	0.00133689	0.000457646	7.96397e-05
Conc (g/g)	K	Cl	Ca
	0.089031	5.39618e-05	0.00334549
SAMPLE	Step #	T (K)	DT	Dt	39Ar%	release	40Ar Total	Err.40Ar	40Ar*	Err.40Ar*	39Ar	Err.39Ar	%39Ar	38Ar	Err.38Ar	38ArCl	Err.38Cl	37Ar	Err.37Ar	36Ar	Err.36Ar	Age	1 s Err Age	Ca/K	Error Ca/K	Cl/K	Error Cl/K
JVL-15 Bt	1	930.827	200	16	7.80316	0.00975395	6.89992e-08	1.922e-11	2.01009e-08	1.06686e-10	1.84575e-10	5.32798e-13	7.80316	4.32283e-11	5.99231e-14	1.04031e-11	7.92343e-14	5.58808e-12	1.08121e-13	1.63782e-10	3.5149e-13	80.0223	0.483742	0.0587353	0.00114902	0.0100325	8.17157e-05
J= 0.00041646	2	960.791	29.964	16	13.1145	0.109419	4.64931e-08	1.364e-11	3.90923e-08	2.10086e-11	3.10209e-10	5.44843e-13	13.1145	2.44057e-11	3.77016e-14	1.64656e-11	4.93579e-14	3.59302e-12	1.07181e-13	2.47891e-11	5.35183e-14	92.2814	0.170501	0.0224704	0.00067146	0.00944808	3.28254e-05
m= 0.01033 g	3	1002.15	41.3619	17	11.8328	0.0693848	3.75326e-08	1.054e-11	3.54494e-08	1.1957e-11	2.79893e-10	5.11396e-13	11.8328	1.88861e-11	2.88288e-14	1.46236e-11	4.78341e-14	2.50214e-12	1.06449e-13	6.97819e-12	1.89113e-14	92.7338	0.173294	0.017343	0.000738507	0.00929997	3.48445e-05
	4	1041.43	39.2732	16	8.9652	0.0570694	2.86612e-08	7.75e-12	2.70333e-08	9.33722e-12	2.12062e-10	6.26432e-13	8.9652	1.42776e-11	2.65225e-14	1.10167e-11	5.81494e-14	2.17914e-12	1.05897e-13	5.4529e-12	1.7443e-14	93.3225	0.278182	0.0199355	0.000970565	0.00924718	5.59333e-05
	5	1077.46	36.0313	16	6.51302	0.04519	2.12328e-08	5.89e-12	1.96306e-08	7.73216e-12	1.54058e-10	5.00124e-13	6.51302	1.05771e-11	1.78713e-14	7.94299e-12	5.28027e-14	2.08768e-12	1.05945e-13	5.36705e-12	1.67785e-14	93.2834	0.305622	0.0262896	0.00133687	0.00917738	6.78945e-05
	6	1136.62	59.1628	21	4.40407	0.0162441	1.48894e-08	4.34e-12	1.31726e-08	6.85205e-12	1.04174e-10	5.89878e-13	4.40407	7.44671e-12	1.65002e-14	5.26522e-12	6.91199e-14	2.9064e-12	1.06468e-13	5.75077e-12	1.77597e-14	92.5889	0.526822	0.0541262	0.00200632	0.0089966	0.000128623
	7	1198.16	61.5404	17	5.11847	0.0201723	1.71873e-08	4.96e-12	1.5221e-08	7.35123e-12	1.21072e-10	5.59758e-13	5.11847	8.46016e-12	1.83435e-14	5.94245e-12	6.76236e-14	5.5596e-12	1.08118e-13	6.58746e-12	1.81731e-14	92.0689	0.428392	0.0890872	0.00178078	0.00873661	0.000107313
	8	1302.55	104.388	17	10.0316	0.0233075	3.32684e-08	9.61e-12	3.00793e-08	1.24506e-11	2.37287e-10	5.06878e-13	10.0316	1.64106e-11	2.65239e-14	1.18945e-11	5.07049e-14	1.61358e-11	1.14157e-13	1.06858e-11	2.65142e-14	92.8158	0.202815	0.131929	0.000974986	0.00892264	4.25448e-05
	9	1397.09	94.5385	17	12.0852	0.0310043	3.95973e-08	1.023e-11	3.65376e-08	1.26963e-11	2.85863e-10	5.12085e-13	12.0852	1.97021e-11	3.09044e-14	1.47586e-11	4.92275e-14	8.22692e-12	1.10829e-13	1.02502e-11	2.5186e-14	93.5639	0.171757	0.0558327	0.000758774	0.00918978	3.47937e-05
	10	1605.08	207.995	16	20.1319	0.0241976	7.10328e-08	2.046e-11	6.20695e-08	2.79733e-11	4.76199e-10	6.56031e-13	20.1319	3.5831e-11	4.69535e-14	2.51489e-11	4.30688e-14	3.38388e-11	1.32921e-13	3.00304e-11	6.38931e-14	95.3695	0.139552	0.137864	0.00057388	0.0094005	2.06617e-05
Conc (g/g)	K	Cl	Ca
	0.0786241	0.00073049	0.00532766

## Sheet: SCH
SAMPLE	Step #	T (K)	DT	Dt	39Ar%	release	40Ar Total	Err.40Ar	40Ar*	Err.40Ar*	39Ar	Err.39Ar	%39Ar	38Ar	Err.38Ar	38ArCl	Err.38Cl	37Ar	Err.37Ar	36Ar	Err.36Ar	Age	1 s Err Age	Ca/K	Error Ca/K	Cl/K	Error Cl/K
SCH-1	1	932.03	200	16	12.4432	0.0155541	3.76777e-08	1.023e-11	1.69045e-08	4.28871e-11	1.38411e-10	5.30016e-13	12.4432	2.61918e-11	3.9833e-14	1.16042e-11	5.43453e-14	4.4548e-11	1.21298e-13	6.95895e-11	1.395e-13	90.2144	0.414852	0.624528	0.00293486	0.0149232	9.02856e-05
J= 0.00041976	2	945.911	13.881	12	12.6007	0.262051	2.41074e-08	7.44e-12	1.87224e-08	1.40779e-11	1.40163e-10	5.60846e-13	12.6007	1.6288e-11	2.49679e-14	1.14086e-11	4.85658e-14	1.21691e-11	9.40239e-14	1.80399e-11	4.00298e-14	98.4256	0.401238	0.168443	0.00146566	0.0144884	8.4648e-05
m= 0.00463 g	3	954.144	8.23305	19	7.79283	0.217149	1.33747e-08	4.03e-12	1.16057e-08	6.54143e-12	8.66828e-11	5.58599e-13	7.79283	8.9254e-12	1.70668e-14	6.89538e-12	5.97289e-14	1.54326e-12	8.53094e-14	5.9254e-12	1.72582e-14	98.6445	0.638421	0.0345393	0.00192221	0.0141594	0.00015287
	4	966.971	12.8269	19	5.46687	0.097778	9.6521e-09	2.54201e-12	8.11086e-09	5.37717e-12	6.08102e-11	4.96083e-13	5.46687	6.33204e-12	1.39352e-14	4.71825e-12	6.85374e-14	1.29047e-12	8.55058e-14	5.16259e-12	1.58707e-14	98.2809	0.804659	0.0411697	0.00274849	0.013811	0.000230092
	5	1003.39	36.4179	17	6.02942	0.0401547	1.05928e-08	3.41001e-12	8.92199e-09	6.08744e-12	6.70677e-11	5.58039e-13	6.02942	6.84631e-12	1.48315e-14	5.08483e-12	6.75521e-14	1.33329e-12	8.5507e-14	5.59649e-12	1.68901e-14	98.0297	0.818643	0.0385672	0.00249414	0.0134953	0.000211547
	6	1042.26	38.8733	19	4.73843	0.0279644	8.45003e-09	2.69701e-12	6.88227e-09	5.273e-12	5.27075e-11	4.64984e-13	4.73843	5.13181e-12	1.35195e-14	3.58657e-12	8.19013e-14	1.25923e-12	8.54835e-14	5.2514e-12	1.51764e-14	96.2684	0.852705	0.0463492	0.0031729	0.0121123	0.000296515
	7	1080.84	38.5768	17	5.10712	0.0321088	8.99745e-09	2.79001e-12	7.33207e-09	5.48333e-12	5.68085e-11	4.95985e-13	5.10712	5.00027e-12	1.20468e-14	3.35021e-12	7.4973e-14	1.28422e-12	8.52255e-14	5.57838e-12	1.58108e-14	95.185	0.834315	0.0438565	0.00293556	0.0104973	0.000252161
	8	1137.05	56.2109	17	6.39129	0.0275768	1.11241e-08	4.34e-12	9.17549e-09	7.02159e-12	7.10929e-11	5.2725e-13	6.39129	5.81011e-12	1.55469e-14	3.83081e-12	8.32555e-14	1.38451e-12	8.53238e-14	6.52696e-12	1.84877e-14	95.1827	0.709921	0.0377814	0.00234516	0.00959145	0.000220256
	9	1199.47	62.4191	17	6.96897	0.0270786	1.25519e-08	3.72001e-12	1.00575e-08	7.55466e-12	7.75187e-11	5.5832e-13	6.96897	6.37971e-12	1.5731e-14	3.98807e-12	7.68334e-14	1.37606e-12	8.54657e-14	8.3551e-12	2.20233e-14	95.6707	0.693067	0.0344379	0.00215324	0.00915749	0.000188352
	10	1304.33	104.86	17	14.441	0.0334013	2.51712e-08	7.75e-12	2.12086e-08	1.20908e-11	1.60633e-10	5.61983e-13	14.441	1.43974e-11	2.49792e-14	1.02036e-11	5.45053e-14	1.59596e-12	8.59865e-14	1.32728e-11	3.10836e-14	97.3129	0.345495	0.0192749	0.00104067	0.0113067	7.21992e-05
	11	1404.74	100.413	19	11.3319	0.0258902	2.14945e-08	6.51e-12	1.6817e-08	1.23127e-11	1.26049e-10	5.29376e-13	11.3319	1.29584e-11	2.29574e-14	8.67721e-12	5.56649e-14	1.4333e-12	8.52675e-14	1.56672e-11	3.50044e-14	98.3065	0.419554	0.0220597	0.00131561	0.0122535	9.39543e-05
	12	1607.83	203.091	18	6.68821	0.00776219	2.83736e-08	8.37e-12	1.01583e-08	3.69548e-11	7.43957e-11	5.27345e-13	6.68821	1.74244e-11	2.68458e-14	5.13732e-12	5.3258e-14	1.63605e-12	8.55168e-14	6.10107e-11	1.2056e-13	100.549	0.801376	0.0426634	0.00225045	0.0122916	0.000154366
Conc (g/g)	K	Cl	Ca
	0.0818414	0.00102792	0.0101139
SAMPLE	Step #	T (K)	DT	Dt	39Ar%	release	40Ar Total	Err.40Ar	40Ar*	Err.40Ar*	39Ar	Err.39Ar	%39Ar	38Ar	Err.38Ar	38ArCl	Err.38Cl	37Ar	Err.37Ar	36Ar	Err.36Ar	Age	1 s Err Age	Ca/K	Error Ca/K	Cl/K	Error Cl/K
SCH-4	1	930.827	200	16	2.80938	0.00351173	3.69385e-08	1.023e-11	4.59034e-09	6.24602e-11	3.97624e-11	5.26655e-13	2.80938	2.1608e-11	4.00489e-14	7.59674e-13	6.96695e-14	3.18832e-12	8.84586e-14	1.08348e-10	2.0638e-13	85.2747	1.6194	0.155566	0.00478277	0.00340075	0.000315119
J= 0.00041925	2	944.299	13.4717	21	4.76203	0.0771365	3.11527e-08	9.6102e-13	1.02929e-08	3.47751e-11	6.73991e-11	6.19895e-13	4.76203	1.70062e-11	1.46681e-14	3.1203e-12	3.5356e-14	1.06184e-11	8.76854e-14	6.98707e-11	1.16431e-13	111.973	1.09747	0.30567	0.00377849	0.00824067	0.000120269
m= 0.00478 g	3	952.931	8.63168	18	1.28783	0.0351664	3.66555e-09	1.27102e-12	2.10097e-09	5.12509e-12	1.82273e-11	5.88355e-13	1.28783	1.19257e-12	6.77233e-15	1.25521e-14	1.76206e-13	2.62279e-13	8.67383e-14	5.24047e-12	1.66298e-14	85.1419	2.7562	0.0279157	0.00927586	0.000122579	0.00172077
	4	964.531	11.6005	18	1.13618	0.0230852	3.39049e-09	1.24002e-12	1.98225e-09	4.73165e-12	1.60808e-11	6.50253e-13	1.13618	1.08415e-12	6.75972e-15	2.54845e-14	1.93458e-13	1.8534e-13	8.6738e-14	4.71683e-12	1.52943e-14	90.9065	3.68242	0.0223597	0.0105032	0.00028209	0.00214144
	5	1000.5	35.9739	19	3.86904	0.024674	8.11296e-09	2.69701e-12	6.36648e-09	5.72069e-12	5.47601e-11	5.26887e-13	3.86904	1.76319e-12	7.20395e-15	8.34969e-14	1.2685e-13	1.16906e-12	8.7339e-14	5.85e-12	1.68979e-14	85.8605	0.829911	0.0414171	0.00311978	0.00027141	0.000412339
	6	1060.84	60.3369	20	22.0959	0.0818866	4.04021e-08	1.147e-11	3.75586e-08	1.33249e-11	3.12732e-10	5.12216e-13	22.0959	5.84604e-12	1.35664e-14	7.57966e-13	7.23181e-14	1.45005e-12	8.71576e-14	9.52451e-12	2.27147e-14	88.6248	0.149577	0.00899524	0.000540875	0.000431417	4.11678e-05
	7	1198.6	137.755	17	44.1473	0.0777272	8.04162e-08	1.581e-11	7.63396e-08	1.82734e-11	6.24836e-10	5.3219e-13	44.1473	1.03928e-11	1.72957e-14	1.24058e-12	5.229e-14	1.72522e-12	8.73316e-14	1.36549e-11	3.06909e-14	90.1198	0.0817432	0.00535651	0.000271187	0.000353411	1.48991e-05
	8	1301.66	103.061	18	12.0169	0.0274827	2.57697e-08	7.13e-12	2.07256e-08	1.31337e-11	1.7008e-10	5.61818e-13	12.0169	5.4034e-12	1.3439e-14	4.27037e-13	7.76968e-14	1.9001e-12	8.7359e-14	1.68954e-11	3.69436e-14	89.8916	0.302885	0.0216734	0.000999025	0.000446922	8.13281e-05
	9	1393.48	91.8204	17	3.43216	0.00906576	1.37696e-08	4.03e-12	6.18831e-09	1.54374e-11	4.85769e-11	4.95852e-13	3.43216	5.37083e-12	1.41583e-14	7.10779e-14	8.24672e-14	2.13689e-12	8.75965e-14	2.53936e-11	4.99133e-14	93.8719	0.986611	0.0853428	0.00360525	0.000260451	0.000302196
	10	1609.66	216.186	17	4.44326	0.00498483	2.93026e-08	8.06e-12	7.98737e-09	4.08098e-11	6.28873e-11	5.57963e-13	4.44326	1.40751e-11	2.25435e-14	-4.91389e-14	5.60952e-14	3.9169e-12	8.88161e-14	7.13945e-11	1.33996e-13	93.5992	0.958519	0.120837	0.00294229	-0.000139086	-0.00015878
Conc (g/g)	K	Cl	Ca
	0.100993	8.19124e-05	0.00367573
SAMPLE	Step #	T (K)	DT	Dt	39Ar%	release	40Ar Total	Err.40Ar	40Ar*	Err.40Ar*	39Ar	Err.39Ar	%39Ar	38Ar	Err.38Ar	38ArCl	Err.38Cl	37Ar	Err.37Ar	36Ar	Err.36Ar	Age	1 s Err Age	Ca/K	Error Ca/K	Cl/K	Error Cl/K
SCH-5	1	930.426	200	16	3.7612	0.0047015	4.09444e-08	1.116e-11	1.01039e-08	6.41933e-11	9.47249e-11	5.89622e-13	3.7612	2.11787e-11	3.46797e-14	7.04073e-13	6.49516e-14	3.06838e-12	8.78895e-14	1.03298e-10	2.11736e-13	78.8498	0.701506	0.0628429	0.00184206	0.00132304	0.00012233
J= 0.00041883	2	944.702	14.2757	17	2.00993	0.0341475	1.1626e-08	3.10001e-12	6.06002e-09	1.15449e-11	5.06196e-11	5.57748e-13	2.00993	4.16353e-12	1.02269e-14	1.15139e-13	7.67493e-14	1.77716e-12	8.7584e-14	1.86432e-11	3.72487e-14	88.2655	0.987156	0.0681113	0.00343962	0.000404879	0.00026992
m= 0.00886 g	3	952.526	7.82416	16	1.23736	0.0395366	5.18452e-09	1.33301e-12	3.74969e-09	4.61454e-12	3.11627e-11	5.57501e-13	1.23736	1.26038e-12	6.43638e-15	2.58902e-14	1.58467e-13	1.23375e-12	8.73404e-14	4.80616e-12	1.4797e-14	88.7042	1.59081	0.076808	0.00560837	0.000147884	0.000905162
	4	965.344	12.8184	17	1.08985	0.020621	4.85902e-09	1.48801e-12	3.40777e-09	4.8379e-12	2.74476e-11	5.57467e-13	1.08985	1.24375e-12	6.77869e-15	3.82389e-14	1.69109e-13	2.91504e-13	8.69335e-14	4.86091e-12	1.54186e-14	91.4549	1.8621	0.0206037	0.00615874	0.000247982	0.0010967
	5	1000.5	35.1605	16	1.72282	0.0122497	7.1555e-09	2.57301e-12	5.39397e-09	5.60184e-12	4.3389e-11	5.57642e-13	1.72282	1.61296e-12	7.53172e-15	4.34419e-14	1.44937e-13	1.24849e-12	8.71528e-14	5.90042e-12	1.66665e-14	91.5718	1.1809	0.0558234	0.00396233	0.000178217	0.000594598
	6	1042.26	41.757	19	2.93733	0.0161379	1.19225e-08	3.41001e-12	9.66124e-09	6.67403e-12	7.39761e-11	5.58198e-13	2.93733	2.30617e-12	8.71953e-15	9.9066e-14	1.17449e-13	1.31627e-12	8.72566e-14	7.57424e-12	1.9216e-14	96.078	0.728265	0.0345191	0.00230308	0.000238371	0.00028261
	7	1077.88	35.6184	17	6.4965	0.0442364	2.39568e-08	6.82e-12	2.14449e-08	9.0468e-12	1.63613e-10	5.00088e-13	6.4965	3.5529e-12	1.11538e-14	2.43907e-13	9.75699e-14	1.44795e-12	8.73238e-14	8.41389e-12	1.99092e-14	96.4152	0.298116	0.0171688	0.00103676	0.000265355	0.000106153
	8	1136.62	58.74	16	19.2933	0.0821133	6.74904e-08	2.077e-11	6.42749e-08	2.20397e-11	4.85899e-10	5.3504e-13	19.2933	7.96058e-12	1.70922e-14	8.14681e-13	6.7019e-14	1.76334e-12	8.7248e-14	1.07706e-11	2.46936e-14	97.2809	0.113868	0.00704035	0.000348434	0.000298443	2.45534e-05
	9	1198.16	61.5404	17	20.3671	0.0802685	7.1566e-08	1.674e-11	6.86805e-08	1.8232e-11	5.12942e-10	5.96753e-13	20.3671	8.09319e-12	1.53725e-14	8.71057e-13	5.94749e-14	1.76011e-12	8.75834e-14	9.66518e-12	2.41945e-14	98.4367	0.119103	0.00665695	0.000331341	0.000302272	2.06419e-05
	10	1304.33	106.168	16	19.9688	0.0470219	6.97181e-08	1.798e-11	6.59846e-08	1.9744e-11	5.02911e-10	5.3775e-13	19.9688	8.55446e-12	1.87193e-14	9.02345e-13	6.83247e-14	1.77221e-12	8.75838e-14	1.25056e-11	2.73228e-14	96.511	0.108886	0.0068364	0.000337938	0.000319375	2.41852e-05
	11	1395.28	90.9548	16	12.0855	0.0332184	4.21279e-08	1.116e-11	3.87219e-08	1.3505e-11	3.0437e-10	5.11345e-13	12.0855	5.91233e-12	1.21724e-14	5.5704e-13	6.42858e-14	1.63511e-12	8.73506e-14	1.14083e-11	2.54733e-14	93.6543	0.161783	0.010422	0.000557034	0.000325765	3.75992e-05
	12	1609.21	213.923	16	9.03019	0.0105531	3.60671e-08	9.3e-12	2.81122e-08	1.85412e-11	2.27423e-10	5.34819e-13	9.03019	7.90444e-12	1.67164e-14	4.86222e-13	6.6635e-14	1.80094e-12	8.73557e-14	2.66449e-11	5.3725e-14	91.0641	0.223159	0.0153627	0.000746054	0.000380557	5.21616e-05
Conc (g/g)	K	Cl	Ca
	0.0970511	3.36185e-05	0.00142904

## Sheet: ERY
SAMPLE	Step #	T (K)	DT	Dt	39Ar%	release	40Ar Total	Err.40Ar	40Ar*	Err.40Ar*	39Ar	Err.39Ar	%39Ar	38Ar	Err.38Ar	38ArCl	Err.38Cl	37Ar	Err.37Ar	36Ar	Err.36Ar	Age	1 s Err Age	Ca/K	Error Ca/K	Cl/K	Error Cl/K
ERY-3	1	929.624	200	16	4.0396	0.0050495	4.55609e-08	1.364e-11	1.66259e-08	6.14353e-11	6.74485e-11	5.26982e-13	4.0396	2.6433e-11	4.54812e-14	7.44857e-12	6.56858e-14	4.20397e-12	1.0655e-13	9.69161e-11	2.00636e-13	177.983	1.53874	0.120923	0.00320712	0.0196572	0.000231602
J= 0.00042062	2	960.385	30.761	16	2.87612	0.0233748	1.94255e-08	4.65e-12	1.26359e-08	1.53882e-11	4.80221e-11	5.57449e-13	2.87612	4.89666e-12	1.34106e-14	1.02563e-13	8.56558e-14	2.86288e-12	1.06789e-13	2.27419e-11	4.91318e-14	189.379	2.21083	0.115659	0.00451836	0.000380161	0.000317525
m= 0.00558 g	3	1000.5	40.1198	17	3.64852	0.0220564	1.90765e-08	5.89e-12	1.72457e-08	7.95422e-12	6.09187e-11	4.95926e-13	3.64852	1.87505e-12	8.15932e-15	7.71383e-14	1.35065e-13	1.68011e-12	1.06419e-13	6.13261e-12	1.79052e-14	202.966	1.65548	0.0535053	0.00341693	0.000225393	0.000394656
	4	1040.59	40.0855	17	6.50255	0.0393435	3.60673e-08	1.116e-11	3.41139e-08	1.23684e-11	1.08572e-10	5.28414e-13	6.50255	2.50574e-12	1.05338e-14	1.28776e-13	1.30511e-13	1.69856e-12	1.05636e-13	6.54328e-12	1.78596e-14	223.939	1.09385	0.0303508	0.00189334	0.000211125	0.000213972
	5	1076.19	35.5984	17	11.0768	0.0754672	6.43895e-08	1.829e-11	6.24355e-08	1.9096e-11	1.84947e-10	5.63392e-13	11.0768	3.48357e-12	1.11371e-14	3.02276e-13	9.93897e-14	1.87159e-12	1.0581e-13	6.54512e-12	1.83866e-14	239.542	0.734938	0.0196322	0.00111151	0.000290922	9.56606e-05
	6	1134.9	58.7138	17	24.1853	0.0999051	1.44013e-07	3.72e-11	1.4169e-07	3.77491e-11	4.03818e-10	5.86786e-13	24.1853	6.38248e-12	1.50133e-14	6.63924e-13	7.33586e-14	2.28945e-12	1.07114e-13	7.78226e-12	2.14876e-14	248.35	0.37024	0.0109989	0.00051484	0.000292653	3.23387e-05
	7	1197.72	62.822	17	21.7092	0.0838123	1.33301e-07	3.41e-11	1.30853e-07	3.4742e-11	3.62475e-10	5.51539e-13	21.7092	5.97328e-12	1.41352e-14	6.11338e-13	7.37647e-14	2.19592e-12	1.05976e-13	8.19911e-12	2.22663e-14	255.032	0.397208	0.0117528	0.000567477	0.000300209	3.62264e-05
	8	1304.33	106.604	16	15.8226	0.0371061	1.17084e-07	2.883e-11	9.30484e-08	5.75475e-11	2.64187e-10	5.69949e-13	15.8226	1.87287e-11	2.84186e-14	7.67682e-13	5.69819e-14	2.47156e-12	1.06448e-13	8.0507e-11	1.66818e-13	249.23	0.561559	0.0181495	0.00078266	0.000517237	3.84086e-05
	9	1389.41	85.0858	16	5.45654	0.0160325	3.03163e-08	6.82e-12	2.78377e-08	9.33625e-12	9.11069e-11	5.5857e-13	5.45654	2.67461e-12	9.4419e-15	1.49818e-13	1.09707e-13	1.73638e-12	1.06068e-13	8.30232e-12	2.13558e-14	218.129	1.34006	0.0369743	0.00226996	0.000292706	0.000214347
	10	1609.21	219.792	16	4.68272	0.00532631	2.882e-08	8.37e-12	2.47868e-08	1.22788e-11	7.81866e-11	4.96432e-13	4.68272	3.4498e-12	1.22633e-14	7.91834e-14	1.10499e-13	1.78317e-12	1.06126e-13	1.35095e-11	3.00912e-14	225.826	1.43893	0.0442456	0.00264822	0.000180269	0.000251565
Conc (g/g)	K	Cl	Ca
	0.101728	0.000112043	0.00269418
SAMPLE	Step #	T (K)	DT	Dt	39Ar%	release	40Ar Total	Err.40Ar	40Ar*	Err.40Ar*	39Ar	Err.39Ar	%39Ar	38Ar	Err.38Ar	38ArCl	Err.38Cl	37Ar	Err.37Ar	36Ar	Err.36Ar	Age	1 s Err Age	Ca/K	Error Ca/K	Cl/K	Error Cl/K
ERY-8	1	931.228	200	16	5.17927	0.00647409	3.33294e-08	9.61e-12	6.6933e-09	5.80758e-11	5.27464e-11	4.96026e-13	5.17927	1.97614e-11	3.69504e-14	2.38334e-12	6.85734e-14	4.80247e-12	1.19856e-13	8.92164e-11	1.91838e-13	93.7902	1.20026	0.176644	0.00471117	0.0080429	0.000243459
J= 0.0004205	2	962.415	31.1866	15	4.05437	0.0335668	9.99669e-09	2.60401e-12	6.00496e-09	9.48915e-12	4.12902e-11	5.57665e-13	4.05437	2.99532e-12	9.77084e-15	3.92295e-14	1.01499e-13	2.09114e-12	1.17278e-13	1.33705e-11	3.05629e-14	107.089	1.45641	0.0982544	0.00566796	0.000169116	0.000437565
m= 0.00504 g	3	1002.15	39.7383	16	4.92908	0.0310096	1.03377e-08	3.03801e-12	7.79065e-09	7.06227e-12	5.01984e-11	4.9597e-13	4.92908	2.19134e-12	8.81689e-15	5.39131e-14	1.2493e-13	1.73231e-12	1.17576e-13	8.5317e-12	2.13539e-14	114.055	1.13187	0.0669494	0.0045919	0.000191172	0.000442998
	4	1043.93	41.7797	18	6.51107	0.0367325	1.52379e-08	5.27e-12	1.24463e-08	8.94576e-12	6.63096e-11	5.58175e-13	6.51107	2.61935e-12	9.67918e-15	1.57872e-13	1.14832e-13	1.78717e-12	1.17991e-13	9.35083e-12	2.42118e-14	137.054	1.15822	0.0522877	0.00348003	0.000423789	0.000308273
	5	1081.68	37.7509	17	9.9869	0.0641622	2.54512e-08	7.13e-12	2.25098e-08	1.04067e-11	1.01708e-10	4.66826e-13	9.9869	3.12215e-12	1.17417e-14	1.93502e-13	1.16811e-13	1.77662e-12	1.17418e-13	9.85233e-12	2.53901e-14	160.538	0.741279	0.0338881	0.00224508	0.00033865	0.000204438
	6	1137.48	55.7953	18	13.836	0.0584488	3.19482e-08	8.68e-12	2.87417e-08	1.1477e-11	1.40907e-10	5.30355e-13	13.836	3.79357e-12	1.07553e-14	2.8483e-13	8.82383e-14	1.93475e-12	1.17392e-13	1.07403e-11	2.51494e-14	148.461	0.562711	0.0266377	0.00161937	0.000359809	0.000111475
	7	1200.78	63.2974	16	15.3232	0.0605206	3.46292e-08	1.147e-11	3.09078e-08	1.46352e-11	1.56053e-10	5.00596e-13	15.3232	4.26654e-12	1.32029e-14	2.73139e-13	9.62819e-14	1.96019e-12	1.17486e-13	1.24652e-11	3.04461e-14	144.322	0.468873	0.0243686	0.00146265	0.000311553	0.000109827
	8	1302.99	102.217	16	16.9441	0.0414414	3.83629e-08	1.085e-11	3.2774e-08	1.67564e-11	1.72561e-10	5.01739e-13	16.9441	5.64895e-12	1.55513e-14	3.02359e-13	8.59249e-14	2.17903e-12	1.1759e-13	1.87202e-11	4.27697e-14	138.618	0.410171	0.0244978	0.00132392	0.000311889	8.86378e-05
	9	1396.19	93.1917	16	11.0833	0.0297325	2.86178e-08	6.82e-12	2.16388e-08	1.67204e-11	1.12874e-10	4.98141e-13	11.0833	5.79297e-12	1.52097e-14	1.96871e-13	8.21702e-14	1.96419e-12	1.17333e-13	2.33759e-11	5.11329e-14	139.87	0.627302	0.0337595	0.00202216	0.000310463	0.000129588
	10	1609.66	213.479	17	12.1528	0.0138069	3.57767e-08	1.023e-11	2.54547e-08	2.34837e-11	1.23765e-10	5.60236e-13	12.1528	8.02815e-12	1.7526e-14	2.06142e-13	6.92934e-14	2.1736e-12	1.17622e-13	3.45731e-11	7.08009e-14	149.644	0.691957	0.0340712	0.00185017	0.000296474	9.9667e-05
Conc (g/g)	K	Cl	Ca
	0.0687159	4.91371e-05	0.00293236
SAMPLE	Step #	T (K)	DT	Dt	39Ar%	release	40Ar Total	Err.40Ar	40Ar*	Err.40Ar*	39Ar	Err.39Ar	%39Ar	38Ar	Err.38Ar	38ArCl	Err.38Cl	37Ar	Err.37Ar	36Ar	Err.36Ar	Age	1 s Err Age	Ca/K	Error Ca/K	Cl/K	Error Cl/K
ERY-11	1	931.228	200	16	10.8585	0.0135731	3.65522e-08	1.054e-11	8.60226e-09	6.0874e-11	7.09014e-11	5.27395e-13	10.8585	2.11178e-11	4.30942e-14	2.71893e-12	7.39866e-14	4.75924e-12	1.19853e-13	9.3617e-11	2.00813e-13	89.7234	0.921369	0.130228	0.00341963	0.00682596	0.000192561
J= 0.00042026	2	962.82	31.5924	15	8.69768	0.0710846	1.04645e-08	3.10001e-12	7.15959e-09	8.92757e-12	5.67924e-11	5.27034e-13	8.69768	2.77133e-12	9.71486e-15	8.58815e-14	1.08975e-13	1.92242e-12	1.17647e-13	1.10699e-11	2.80415e-14	93.137	0.872298	0.0656704	0.0040648	0.000269172	0.000341561
m= 0.00357 g	3	1000.92	38.0965	16	9.9613	0.0653688	1.04351e-08	3.41001e-12	8.11238e-09	7.10617e-12	6.50433e-11	5.27236e-13	9.9613	2.20962e-12	8.82074e-15	5.76366e-14	1.23969e-13	1.81825e-12	1.17419e-13	7.78006e-12	2.0882e-14	92.1691	0.751704	0.0542325	0.00352973	0.00015773	0.00033926
	4	1043.52	42.598	16	10.639	0.0624382	1.10622e-08	3.03801e-12	8.65999e-09	7.3169e-12	6.94683e-11	5.58256e-13	10.639	2.33316e-12	1.00064e-14	8.4382e-14	1.3318e-13	1.76123e-12	1.17576e-13	8.04641e-12	2.2295e-14	92.1245	0.744644	0.0491857	0.00330725	0.000216214	0.000341255
	5	1079.15	35.6334	18	9.90075	0.0654899	1.07524e-08	2.97601e-12	8.12717e-09	7.40346e-12	6.4648e-11	5.27225e-13	9.90075	2.43876e-12	9.25378e-15	9.9892e-14	1.17869e-13	1.7686e-12	1.17642e-13	8.79336e-12	2.27056e-14	92.8833	0.762444	0.0530743	0.00355679	0.00027504	0.000324546
	6	1137.48	58.3304	17	10.6746	0.0443846	1.1771e-08	3.72001e-12	9.02448e-09	7.80813e-12	6.97008e-11	4.65583e-13	10.6746	2.58115e-12	1.1234e-14	1.12475e-13	1.35102e-13	1.70011e-12	1.17236e-13	9.19974e-12	2.29937e-14	95.5891	0.644138	0.0473202	0.0032784	0.000287236	0.000345026
	7	1199.9	62.4258	16	10.2466	0.0410351	1.21074e-08	3.41001e-12	8.98336e-09	8.33142e-12	6.69062e-11	5.5819e-13	10.2466	2.79791e-12	9.33921e-15	1.20245e-13	1.03795e-13	1.71368e-12	1.17151e-13	1.04642e-11	2.54609e-14	99.0327	0.831556	0.0496904	0.00342216	0.000319904	0.000276153
	8	1302.99	103.089	17	10.5394	0.0247958	1.36841e-08	4.03e-12	9.37402e-09	1.07163e-11	6.88179e-11	4.65556e-13	10.5394	3.59162e-12	1.1466e-14	1.44783e-13	9.93151e-14	1.87198e-12	1.1736e-13	1.44367e-11	3.32586e-14	100.43	0.689347	0.0527728	0.00332768	0.000374488	0.000256895
	9	1395.73	92.7407	16	8.05229	0.0217065	1.29634e-08	3.72001e-12	7.17445e-09	1.32742e-11	5.25783e-11	4.96022e-13	8.05229	4.32162e-12	1.24427e-14	1.11728e-13	8.98064e-14	1.97572e-12	1.17996e-13	1.93902e-11	4.2679e-14	100.601	0.967378	0.0729008	0.00440786	0.000378247	0.000304054
	10	1609.21	213.472	16	10.43	0.0122147	1.89801e-08	6.2e-12	9.64035e-09	1.99938e-11	6.81037e-11	5.27317e-13	10.43	6.71743e-12	1.62868e-14	1.01532e-13	7.63663e-14	2.48265e-12	1.18806e-13	3.12834e-11	6.36661e-14	104.255	0.835968	0.0707223	0.0034284	0.000265371	0.000199606
Conc (g/g)	K	Cl	Ca
	0.0622339	6.17123e-05	0.00402613
