# Supplementary material for: Kinematics and time-resolved evolution of the main thrust-sense shear zone in the Eo-Alpine orogenic wedge (the Vinschgau Shear Zone, eastern Alps)
Source: Copernicus journal article supplement (doi:10.5194/se-14-551-2023), 2023-05-24
Supplement: Supplementary file [file se-14-551-2023-supplement-title-page.pdf › se-14-551-2023-supplement-title-page.pdf]

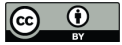

*Supplement of*

**Kinematics and time-resolved evolution of the main thrust-sense shear zone in the Eo-Alpine orogenic wedge (the Vinschgau Shear Zone, eastern Alps)**

**Chiara Montemagni et al.**

*Correspondence to:* Chiara Montemagni ([chiara.montemagni@unimib.it](mailto:chiara.montemagni@unimib.it))

- [se-14-551-2023-supplement-title-page.pdf](#)
- [Montemagni et al\\_SUPPLEMENTARY\\_Table\\_1.xlsx](#)
- [Montemagni et al\\_SUPPLEMENTARY\\_Table\\_2\\_R1.xlsx](#)
- [Montemagni et al\\_SUPPLEMENTARY\\_Table\\_3\\_R1.xlsx](#)

The copyright of individual parts of the supplement might differ from the article licence.
